# Supplementary material for: Inhibition of tumor recurrence and metastasis via a surgical tumor-derived personalized hydrogel vaccine
Source: Royal Society of Chemistry journal article supplement (doi:10.1039/d1bm01596f), 2022-01-01
Supplement: d1bm01596f1.pdf [file d1bm01596f1.pdf]

**Figure S1.** Fluorescence imaging (a) and quantification (b) of Rhodamine labeled PTLDH in mice (n = 3 per group).

**Figure S2.** Accumulative release profile of OVA protein from PTLDH (n = 3 per group).

**Figure S3.** *In vivo* DCs maturation induced by the treatment of AlgMA alone and PTLDH alone. Flow cytometry analysis (a) and statistic (b) of CD45<sup>+</sup>CD11c<sup>+</sup>MHCII<sup>+</sup> DCs. Flow cytometry analysis (c) and statistic (d) of CD80<sup>+</sup>CD86<sup>+</sup> DCs in CD11c<sup>+</sup>MHCII<sup>+</sup> cells (n = 4 per group). \*P < 0.05, \*\*P < 0.01.

**Figure S4.** *In vivo* inhibition of tumor recurrence in 7 days after the treatment. Representative flow cytometry analysis of matured DCs (a), CD8<sup>+</sup> (b) and CD4<sup>+</sup> T cells (c) after the treatment of different therapeutics. The statistics of matured DCs (d), CD8<sup>+</sup> T (e) and CD4<sup>+</sup> T cells (f). I: PBS group, II: AlgMA group, III: PTLDH group, IV: PTLDH/GM-CSF group, V: PTLDH/GM-CSF/ $\alpha$ PD-L1 group, VI:  $\alpha$ PD-L1 group (n = 4 per group). \*\*P < 0.01, \*\*\*P < 0.001.

**Figure S5.** CD8<sup>+</sup> T cells proliferation (a) and TNF $\alpha$  secretion (b) in the spleen of mice after treatment. I: PBS group, II: AlgMA group, V: PTLDH/GM-CSF/ $\alpha$ PD-L1 group (n = 4 per group). \*\*\*\*P < 0.0001.

**Figure S6.** Hematology evaluations. (a) Liver toxicity evaluated using values of alanine aminotransferase (ALT), aspartate aminotransferase (AST) and alkaline phosphatase (ALP) in the serum. (b) Kidney toxicity evaluated using creatinine (CREA) and creatine kinase (CK) in the serum (n = 3 per group) *n.s.* = no significance.
