# Supplementary figures and images for: Inhibition of tumor recurrence and metastasis via a surgical tumor-derived personalized hydrogel vaccine
Source: Royal Society of Chemistry journal article supplement (doi:10.1039/d1bm01596f), 2022-01-01

Figure S1.

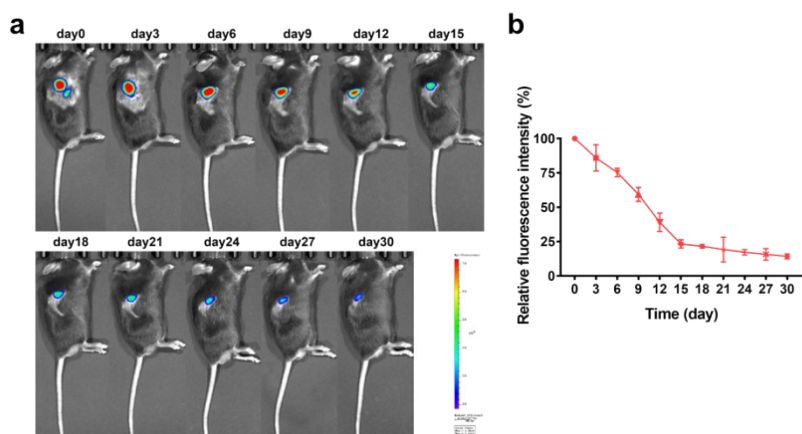

Figure S2.

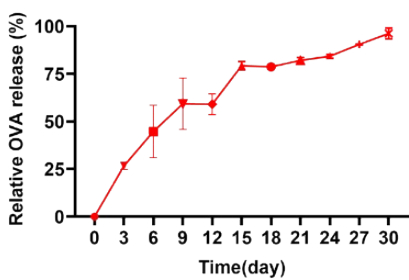

Figure S3.

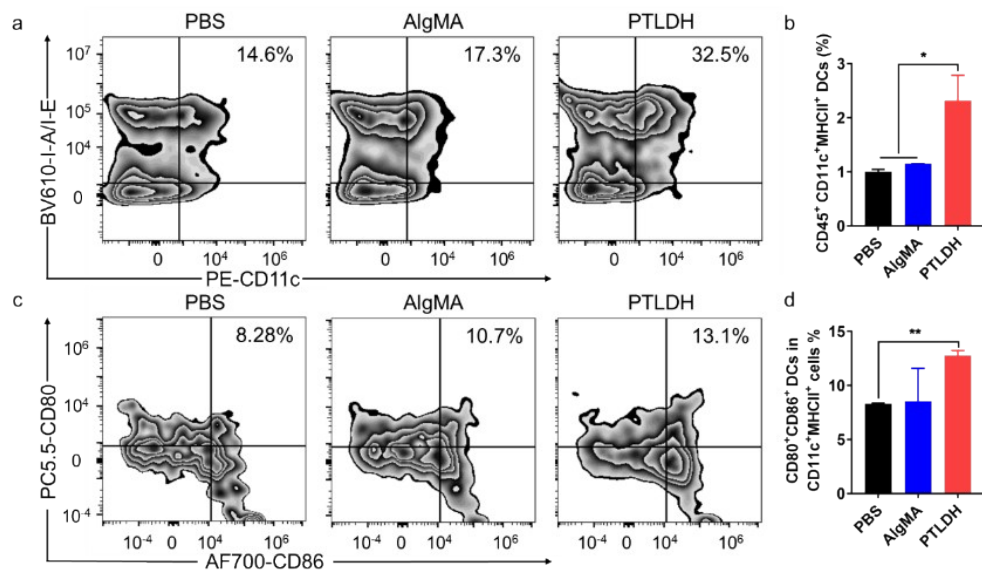

Figure S4.

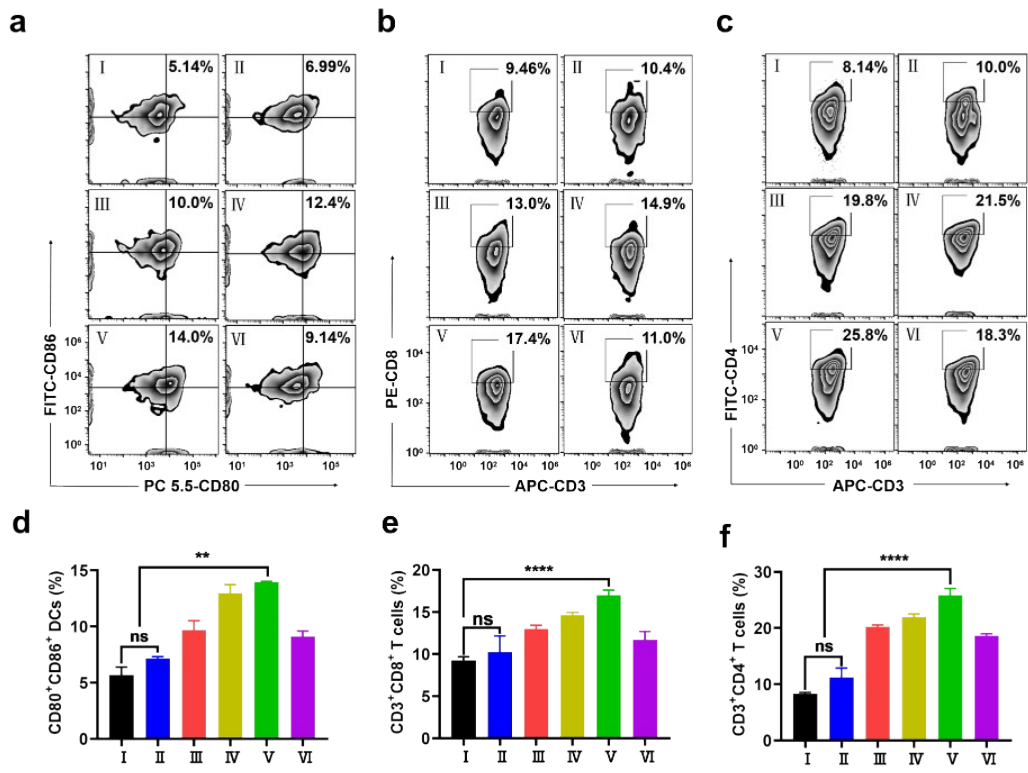

Figure S5.

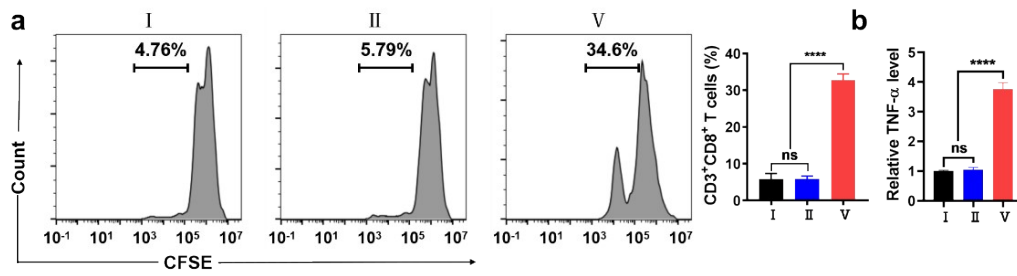

Figure S6.

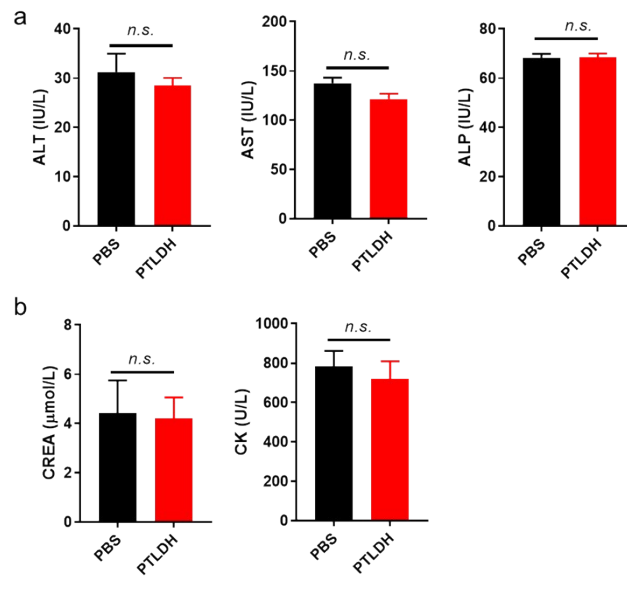

Supplement: d1bm01596f2.pdf [file d1bm01596f2.pdf]
